# Supplementary material
Source: PubMed Central journal article supplement (PMC9772160)

## Supplemental information

**Table S1 Sites that have contributed to TrialNet, INIT and ADDN, and their years of participation**

|                                        | <b>TrialNet</b> | <b>INIT</b> | <b>ADDN</b> |
|----------------------------------------|-----------------|-------------|-------------|
| <b>AUSTRALIA</b>                       |                 |             |             |
| National call centre                   | .               | 2006-2016   | .           |
| <i>Queensland</i>                      |                 |             |             |
| Royal Brisbane Hospital                | 2006-2009       | .           | .           |
| Mater Hospital                         | .               | .           | 2007-       |
| Mater/Queensland Children's Hospital   | 2005-2019       | 2006-2014   | 2013-       |
| <i>New South Wales</i>                 |                 |             |             |
| Hunter Diabetes Center                 | 2016-2018       | .           | .           |
| John Hunter Hospital                   | 2015-2018       | .           | 2012-       |
| Royal North Shore Hospital             | 2012-2019       | 2007-2013   | .           |
| St George Hospital                     | .               | .           | 2014-       |
| Westmead Hospital                      | .               | .           | 2017-       |
| Blacktown Hospital                     | .               | .           | 2020-       |
| Liverpool Hospital                     | .               | .           | 2020-       |
| The Children's Hospital at Westmead    | 2006-2019       | 2007-2013   | 2014-       |
| Campbelltown Hospital                  | 2017-2019       | .           | 2020-       |
| Illawarra Diabetes Service             | 2006-2008       | .           | 2021-       |
| <i>Australian Capital Territory</i>    |                 |             |             |
| Canberra Hospital                      | 2010-2019       | 2006-2013   | 2021-       |
| <i>Victoria</i>                        |                 |             |             |
| Baker IDI Heart and Diabetes Institute | 2018            | .           | .           |
| Royal Children's Hospital              | 2006-2010       | 2008-2013   | 2013-       |
| Geelong Hospital                       | .               | .           | 2020-       |
| Ballarat Hospital                      | .               | .           | 2020-       |
| Sunshine Hospital                      | .               | .           | 2017-       |
| Royal Melbourne Hospital               | 2005-2019       | 2006-2014   | 2017-       |
| St Vincent's Hospital                  | 2006-2008       | .           | 2017-       |
| Monash Children's Hospital             | 2006-2019       | 2011-2014   | 2013-       |
| <i>South Australia</i>                 |                 |             |             |
| Lyell McEwin and Modbury Hospitals     | .               | .           | 2017-       |
| Women's and Children's Hospital        | 2005-2019       | 2007-2016   | 2013-       |
| <i>Western Australia</i>               |                 |             |             |
| Perth Children's Hospital              | 2005-2019       | 2007-2014   | 2013-       |
| Fiona Stanley Hospital                 | .               | .           | 2018-       |
| Fremantle Hospital                     | 2005-2007       | .           | .           |

**NEW ZEALAND***North Island*

|                                     |           |           |       |
|-------------------------------------|-----------|-----------|-------|
| Auckland Diabetes Centre            | 2006-2007 | .         | .     |
| North Shore Hospital                | 2006-2008 | .         | .     |
| Liggins Institute/Starship Hospital | 2006-2019 | 2008-2014 | 2017- |
| Wellington Hospital                 | 2006-2019 | .         | .     |

*South Island*

|                              |           |           |       |
|------------------------------|-----------|-----------|-------|
| Christchurch Diabetes Centre | 2006-2016 | .         | .     |
| Christchurch Hospital        | 2006-2018 | 2008-2012 | 2018- |
| Dunedin Hospital             | 2006-2019 | .         | 2018- |

**Table S2. HbA1c, insulin dose and IDAA1c values presented as predicted mean (95%CI) N for time course data presented in Figure 3**

| Months after diagnosis | HbA1c (mmol/mol) |      |               |    | Insulin dose (U/kg/day) |      |                  |    | IDAA1c           |      |                  |    |
|------------------------|------------------|------|---------------|----|-------------------------|------|------------------|----|------------------|------|------------------|----|
|                        | ADDN             |      | TrialNet/INIT |    | ADDN                    |      | TrialNet/INIT    |    | ADDN             |      | TrialNet/INIT    |    |
| 0                      | 96 (97,96)       | 2415 | 68 (73,63)    | 28 | 0.74 (0.73,0.75)        | 2029 | 0.33 (0.22,0.44) | 18 | 13 (12.9,13.2)   | 453  | 9.7 (8.5,10.9)   | 6  |
| 1                      | 69 (70,69)       | 1800 | 54 (61,47)    | 13 | 0.56 (0.55,0.57)        | 2966 | 0.39 (0.29,0.49) | 24 | 10.6 (10.5,10.7) | 1434 | 8.3 (7.3,9.3)    | 10 |
| 2                      | 58 (59,57)       | 1700 | 48 (53,42)    | 25 | 0.53 (0.52,0.54)        | 1844 | 0.36 (0.26,0.47) | 19 | 9.5 (9.4,9.6)    | 1412 | 8 (7.2,8.8)      | 16 |
| 3                      | 55 (56,55)       | 1780 | 51 (56,45)    | 24 | 0.57 (0.56,0.58)        | 1638 | 0.46 (0.36,0.57) | 22 | 9.5 (9.4,9.6)    | 1503 | 8.7 (8,9.5)      | 20 |
| 4                      | 57 (57,56)       | 1863 | 54 (60,48)    | 19 | 0.56 (0.55,0.57)        | 1673 | 0.55 (0.44,0.66) | 18 | 9.5 (9.4,9.6)    | 1586 | 9.5 (8.7,10.2)   | 16 |
| 5                      | 57 (58,57)       | 1603 | 56 (62,50)    | 18 | 0.59 (0.58,0.6)         | 1385 | 0.53 (0.41,0.65) | 16 | 9.8 (9.7,9.8)    | 1333 | 9.5 (8.7,10.4)   | 14 |
| 6                      | 58 (59,58)       | 1573 | 60 (66,54)    | 20 | 0.61 (0.59,0.62)        | 1356 | 0.57 (0.45,0.69) | 15 | 9.9 (9.8,10)     | 1310 | 10.1 (9.3,10.9)  | 14 |
| 7                      | 59 (60,59)       | 1643 | 59 (65,53)    | 17 | 0.62 (0.61,0.63)        | 1451 | 0.6 (0.49,0.71)  | 18 | 10.1 (10,10.2)   | 1393 | 10.1 (9.3,10.9)  | 16 |
| 8                      | 61 (62,61)       | 1598 | 61 (67,56)    | 22 | 0.66 (0.64,0.67)        | 1387 | 0.52 (0.41,0.63) | 18 | 10.4 (10.3,10.5) | 1340 | 9.8 (9,10.6)     | 17 |
| 9                      | 62 (62,61)       | 1489 | 61 (67,55)    | 20 | 0.67 (0.66,0.69)        | 1260 | 0.67 (0.56,0.78) | 20 | 10.5 (10.4,10.6) | 1202 | 10.6 (9.9,11.4)  | 17 |
| 10                     | 62 (63,61)       | 1538 | 59 (66,53)    | 17 | 0.67 (0.66,0.68)        | 1339 | 0.57 (0.46,0.69) | 16 | 10.5 (10.4,10.6) | 1287 | 10 (9.2,10.8)    | 14 |
| 11                     | 62 (63,62)       | 1525 | 59 (65,54)    | 21 | 0.7 (0.69,0.72)         | 1317 | 0.64 (0.54,0.75) | 20 | 10.7 (10.6,10.8) | 1280 | 10.2 (9.5,10.9)  | 19 |
| 12                     | 63 (63,62)       | 1495 | 56 (62,50)    | 21 | 0.72 (0.7,0.73)         | 1258 | 0.66 (0.55,0.77) | 18 | 10.8 (10.7,10.8) | 1223 | 10 (9.3,10.8)    | 17 |
| 13                     | 63 (64,62)       | 1491 | 60 (66,55)    | 25 | 0.73 (0.72,0.75)        | 1253 | 0.6 (0.5,0.71)   | 21 | 10.9 (10.8,11)   | 1214 | 10.2 (9.5,10.9)  | 21 |
| 14                     | 64 (64,63)       | 1425 | 61 (68,55)    | 16 | 0.75 (0.74,0.77)        | 1222 | 0.75 (0.63,0.88) | 13 | 11 (10.9,11.1)   | 1184 | 10.7 (9.8,11.5)  | 12 |
| 15                     | 64 (64,63)       | 1475 | 62 (68,56)    | 20 | 0.76 (0.75,0.77)        | 1237 | 0.73 (0.62,0.85) | 17 | 11 (10.9,11.1)   | 1197 | 10.8 (10,11.6)   | 17 |
| 16                     | 64 (65,63)       | 1381 | 62 (68,56)    | 19 | 0.78 (0.77,0.79)        | 1158 | 0.78 (0.66,0.9)  | 16 | 11.1 (11,11.2)   | 1121 | 11.1 (10.3,11.9) | 16 |
| 17                     | 64 (65,63)       | 1372 | 64 (72,57)    | 10 | 0.78 (0.77,0.79)        | 1153 | 0.85 (0.7,1.01)  | 8  | 11.1 (11,11.2)   | 1113 | 11.7 (10.7,12.8) | 8  |
| 18                     | 64 (65,64)       | 1391 | 59 (64,53)    | 24 | 0.8 (0.79,0.82)         | 1151 | 0.8 (0.69,0.91)  | 19 | 11.3 (11.2,11.4) | 1119 | 10.8 (10.1,11.5) | 19 |
| 19                     | 64 (65,63)       | 1384 | 62 (68,55)    | 17 | 0.81 (0.79,0.82)        | 1149 | 0.82 (0.7,0.94)  | 14 | 11.3 (11.2,11.4) | 1109 | 11.1 (10.3,11.9) | 13 |
| 20                     | 65 (65,64)       | 1332 | 61 (68,53)    | 10 | 0.82 (0.81,0.83)        | 1113 | 0.72 (0.56,0.89) | 7  | 11.4 (11.3,11.5) | 1077 | 10.7 (9.6,11.8)  | 7  |
| 21                     | 65 (65,64)       | 1330 | 64 (70,59)    | 21 | 0.82 (0.81,0.84)        | 1083 | 0.82 (0.71,0.93) | 17 | 11.4 (11.3,11.5) | 1053 | 11.2 (10.5,12)   | 17 |
| 22                     | 65 (66,64)       | 1408 | 63 (68,57)    | 25 | 0.84 (0.83,0.85)        | 1125 | 0.77 (0.66,0.88) | 20 | 11.5 (11.4,11.6) | 1103 | 11 (10.2,11.7)   | 19 |
| 23                     | 65 (66,65)       | 1300 | 66 (73,58)    | 11 | 0.85 (0.84,0.86)        | 1074 | 0.95 (0.8,1.1)   | 9  | 11.6 (11.5,11.7) | 1048 | 12.1 (11.1,13.1) | 9  |
| 24                     | 65 (66,65)       | 1284 | 67 (74,61)    | 15 | 0.85 (0.84,0.86)        | 1025 | 0.83 (0.69,0.98) | 9  | 11.6 (11.5,11.7) | 995  | 11.6 (10.7,12.6) | 9  |
| 25                     | 65 (66,65)       | 1323 | 68 (73,62)    | 22 | 0.86 (0.85,0.87)        | 1061 | 0.91 (0.8,1.02)  | 19 | 11.6 (11.5,11.7) | 1027 | 12.1 (11.4,12.8) | 19 |
| 26                     | 66 (67,65)       | 1257 | 64 (70,58)    | 19 | 0.86 (0.85,0.87)        | 1026 | 0.9 (0.77,1.02)  | 14 | 11.7 (11.6,11.8) | 993  | 11.7 (10.9,12.5) | 14 |
| 27                     | 66 (67,65)       | 1250 | 63 (70,57)    | 14 | 0.88 (0.86,0.89)        | 992  | 0.92 (0.78,1.06) | 10 | 11.7 (11.6,11.8) | 959  | 11.5 (10.6,12.5) | 10 |
| 28                     | 66 (67,65)       | 1211 | 68 (74,62)    | 21 | 0.87 (0.86,0.89)        | 950  | 0.95 (0.84,1.06) | 18 | 11.7 (11.6,11.8) | 931  | 12.2 (11.4,12.9) | 18 |
| 29                     | 66 (67,66)       | 1223 | 64 (71,58)    | 16 | 0.89 (0.88,0.91)        | 982  | 0.97 (0.84,1.1)  | 12 | 11.8 (11.7,11.9) | 945  | 12.1 (11.2,12.9) | 12 |
| 30                     | 66 (66,65)       | 1230 | 68 (76,61)    | 11 | 0.89 (0.87,0.9)         | 958  | 1.01 (0.85,1.17) | 8  | 11.7 (11.6,11.8) | 944  | 12.8 (11.7,13.8) | 8  |
| 31                     | 66 (67,65)       | 1242 | 70 (77,63)    | 14 | 0.89 (0.88,0.91)        | 984  | 0.98 (0.85,1.11) | 12 | 11.8 (11.7,11.9) | 956  | 11.9 (11,12.8)   | 11 |
| 32                     | 66 (67,65)       | 1163 | 68 (74,62)    | 17 | 0.9 (0.88,0.91)         | 918  | 0.85 (0.72,0.98) | 12 | 11.9 (11.8,12)   | 888  | 11.7 (10.8,12.6) | 11 |
| 33                     | 66 (67,66)       | 1153 | 64 (73,56)    | 8  | 0.92 (0.9,0.93)         | 921  | 0.89 (0.7,1.08)  | 5  | 11.9 (11.8,12)   | 890  | 11.7 (10.1,13.3) | 3  |
| 34                     | 67 (68,66)       | 1174 | 64 (70,58)    | 17 | 0.91 (0.89,0.92)        | 896  | 0.95 (0.83,1.07) | 15 | 12 (11.9,12.1)   | 879  | 11.5 (10.7,12.4) | 15 |
| 35                     | 67 (67,66)       | 1155 | 62 (69,55)    | 13 | 0.92 (0.9,0.93)         | 882  | 0.9 (0.77,1.03)  | 12 | 12 (11.9,12.1)   | 855  | 11.5 (10.6,12.4) | 12 |
| 36                     | 67 (67,66)       | 1128 | 67 (74,60)    | 13 | 0.92 (0.9,0.93)         | 862  | 0.88 (0.75,1.01) | 13 | 12 (11.9,12.1)   | 840  | 12.1 (11.2,13)   | 12 |

Different individuals potentially contributing to different time points. Insulin dose-adjusted HbA1c (IDAA1c) was calculated as 4 x daily insulin dose per kilogram body weight added to HbA1c (in percentage units; (23)).

**Table S3. Members of the Australasian Diabetes Data Network**

| <b>Name</b>                                   | <b>Organization</b>                          |
|-----------------------------------------------|----------------------------------------------|
| <b>Professor Maria Craig</b> Medical Director | The Children's Hospital at Westmead, Sydney  |
| <b>Professor Peter Colman</b> ADDN PI         | The Royal Melbourne Hospital, Melbourne      |
| <b>A/Prof Sarah Glastras</b> ADDN PI          | Royal North Shore Hospital, Sydney           |
| <b>Dr Craig Jefferies</b> ADDN PI             | Starship Children's Health, New Zealand      |
| <b>Clinical Professor Tim Jones</b> ADDN PI   | Perth Children's Hospital, Perth             |
| <b>Dr Stephanie Johnson</b> ADDN PI           | Queensland Children's Hospital, Brisbane     |
| <b>Professor Richard Sinnott</b> ADDN PI      | eResearch, University of Melbourne           |
| <b>Dr Anthony Zimmermann</b> ADDN PI          | Lyell McEwin Hospital, Elizabeth Vale        |
| <b>Dr Kym Anderson</b>                        | University Hospital Geelong, Geelong         |
| <b>A/Prof Sof Andrikopoulos</b>               | Australian Diabetes Society                  |
| <b>Clinical Professor Geoff Ambler</b>        | The Children's Hospital at Westmead, Sydney  |
| <b>Dr Helen Barrett</b>                       | The Mater Private Hospital, Brisbane         |
| <b>Professor Jenny Batch</b>                  | Queensland Children's Hospital, Brisbane     |
| <b>A/Prof Philip Bergman</b>                  | Monash Children's Hospital, Melbourne        |
| <b>Professor Fergus Cameron</b>               | Royal Children's Hospital, Melbourne         |
| <b>A/Prof Louise Conwell</b>                  | Queensland Children's Hospital, Brisbane     |
| <b>A/Prof Andrew Cotterill</b>                | Queensland Children's Hospital, Brisbane     |
| <b>Dr Chris Cooper</b>                        | University Hospital Geelong, Geelong         |
| <b>Professor Jennifer Couper</b>              | Women's and Children's Hospital, Adelaide    |
| <b>A/Prof Elizabeth Davis</b>                 | Perth Children's Hospital, Perth             |
| <b>Dr Martin de Bock</b>                      | Christchurch Hospital, New Zealand           |
| <b>Professor Kim Donaghue</b>                 | The Children's Hospital at Westmead, Sydney  |
| <b>Dr Jan Fairchild</b>                       | Women's and Children's Hospital, Adelaide    |
| <b>Dr Gerry Fegan</b>                         | Fiona Stanley Hospital, Perth                |
| <b>Dr Spiros Fourlanos</b>                    | The Royal Melbourne Hospital, Melbourne      |
| <b>Dr Peter Goss</b>                          | Geelong, Victoria                            |
| <b>Dr Leonie Gray</b>                         | Mater Medical Centre, Rockhampton            |
| <b>A/Prof Shane Hamblin</b>                   | Western Health, Melbourne                    |
| <b>Professor Paul Hofman</b>                  | University of Auckland, New Zealand          |
| <b>A/Prof Dianne Jane Holmes-Walker</b>       | Westmead Hospital, Sydney                    |
| <b>Dr Steven James</b>                        | University of the Sunshine Coast, Caboolture |
| <b>Dr Jeff Kao</b>                            | Royal Children's Hospital, Melbourne         |
| <b>A/Prof Bruce R King</b>                    | John Hunter Children's Hospital, Newcastle   |

|                               |                                                   |
|-------------------------------|---------------------------------------------------|
| <b>Dr Antony Lafferty</b>     | The Canberra Hospital, Canberra                   |
| <b>Ms Michelle Martin</b>     | Illawarra Shoalhaven Diabetes Service, Wollongong |
| <b>Dr Robert McCrossin</b>    | Gladstone Hospital, Gladstone                     |
| <b>Dr Mark Pascoe</b>         | Royal Hobart Hospital, Hobart                     |
| <b>Dr Ryan Paul</b>           | Waikato Hospital, New Zealand                     |
| <b>Dr Dorota Pawlak</b>       | JDRF Australia                                    |
| <b>Dr Alexia Peña</b>         | The University of Adelaide, Adelaide              |
| <b>A/Prof Darrell Price</b>   | Pacific Private Clinic, Gold Coast                |
| <b>A/Prof Christine Rodda</b> | Sunshine Hospital, Melbourne                      |
| <b>Prof David Simmons</b>     | Campbelltown Hospital, Sydney                     |
| <b>Dr Carmel Smart</b>        | John Hunter Children's Hospital, Newcastle        |
| <b>Dr Monique Stone</b>       | Royal North Shore Hospital, Sydney                |
| <b>A/Prof Steve Stranks</b>   | Australian Diabetes Society                       |
| <b>Dr Elaine Tham</b>         | Women's and Children's Hospital, Adelaide         |
| <b>Dr Kris Neville</b>        | Sydney Children's Hospital, Sydney                |
| <b>Dr Tony Huynh</b>          | Queensland Children's Hospital, Brisbane          |
| <b>A/Prof Glenn Ward</b>      | St. Vincent's Hospital, Melbourne                 |
| <b>A/Prof Ben Wheeler</b>     | Dunedin School of Medicine, New Zealand           |
| <b>Dr Helen Woodhead</b>      | Australasian Paediatric Endocrine Group           |

**Figure S1. Age and geographical distribution of the 17,105 TrialNet/INIT participants**  
 A. Distribution of participant ages at first screen. B. Geographical distribution of participants compared to that of the general population according to 2020 census data.

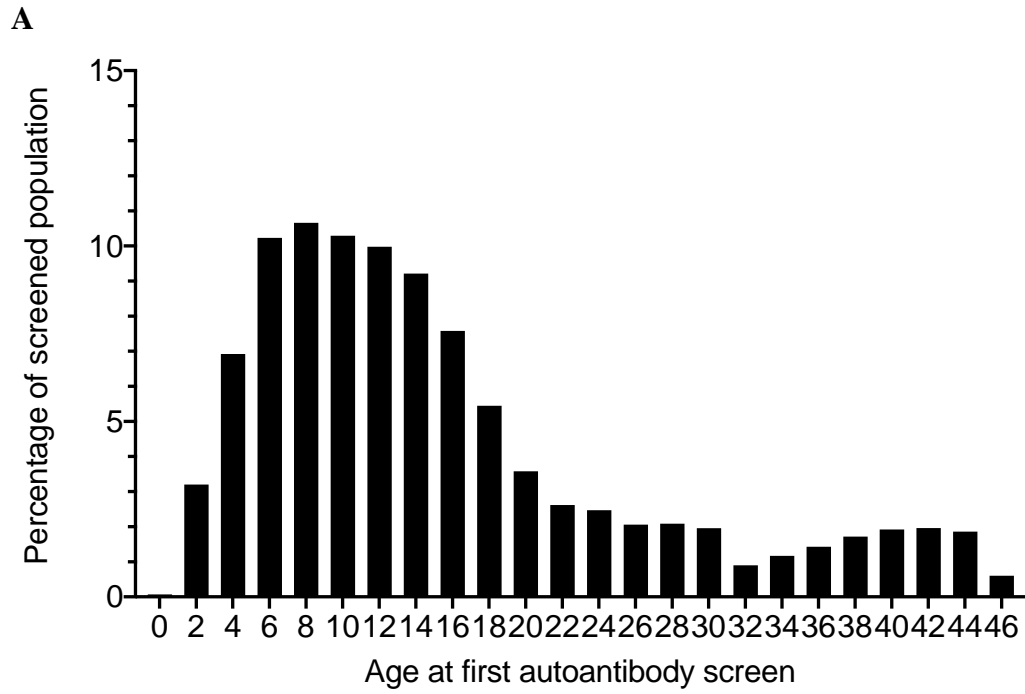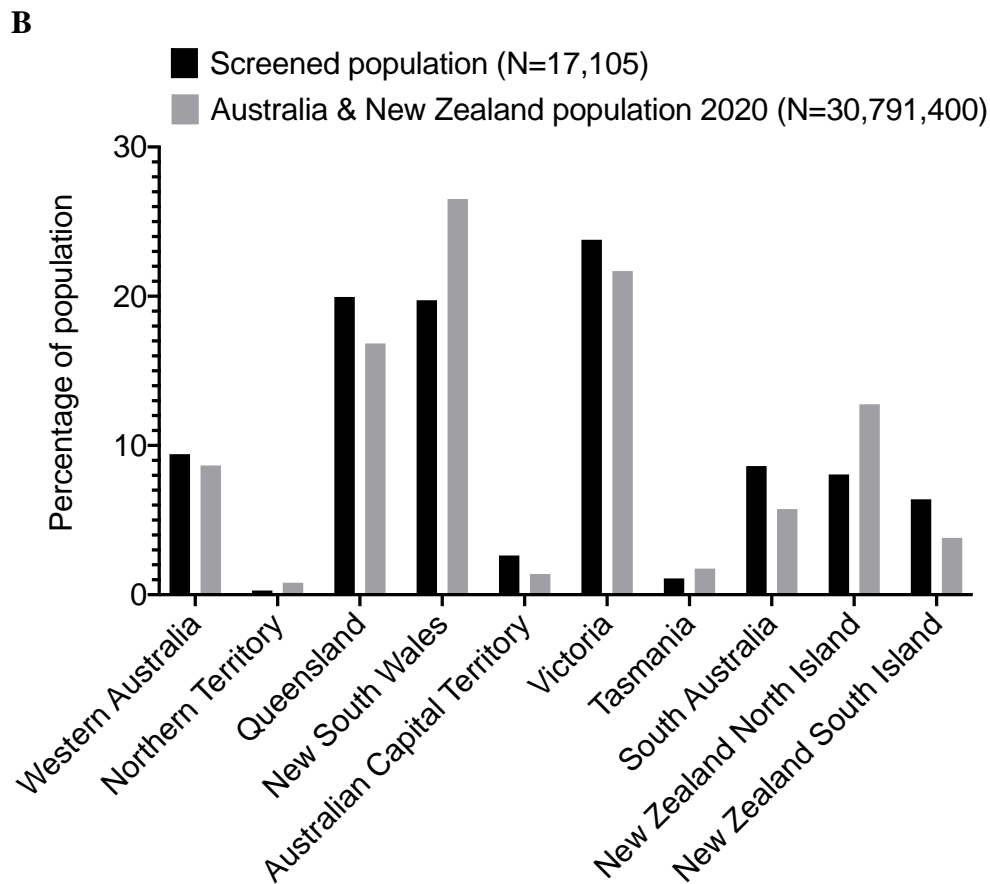

Supplement: NIHMS1839203-supplement-1.pdf [file NIHMS1839203-supplement-1.pdf]
